# Supplementary material for: Caspase-11 Mediates Neutrophil Chemotaxis and Extracellular Trap Formation During Acute Gouty Arthritis Through Alteration of Cofilin Phosphorylation
Source: PubMed Central journal article supplement (PMC6874099; doi:10.3389/fimmu.2019.02519), 2019-11-15

# Supp Fig. 1

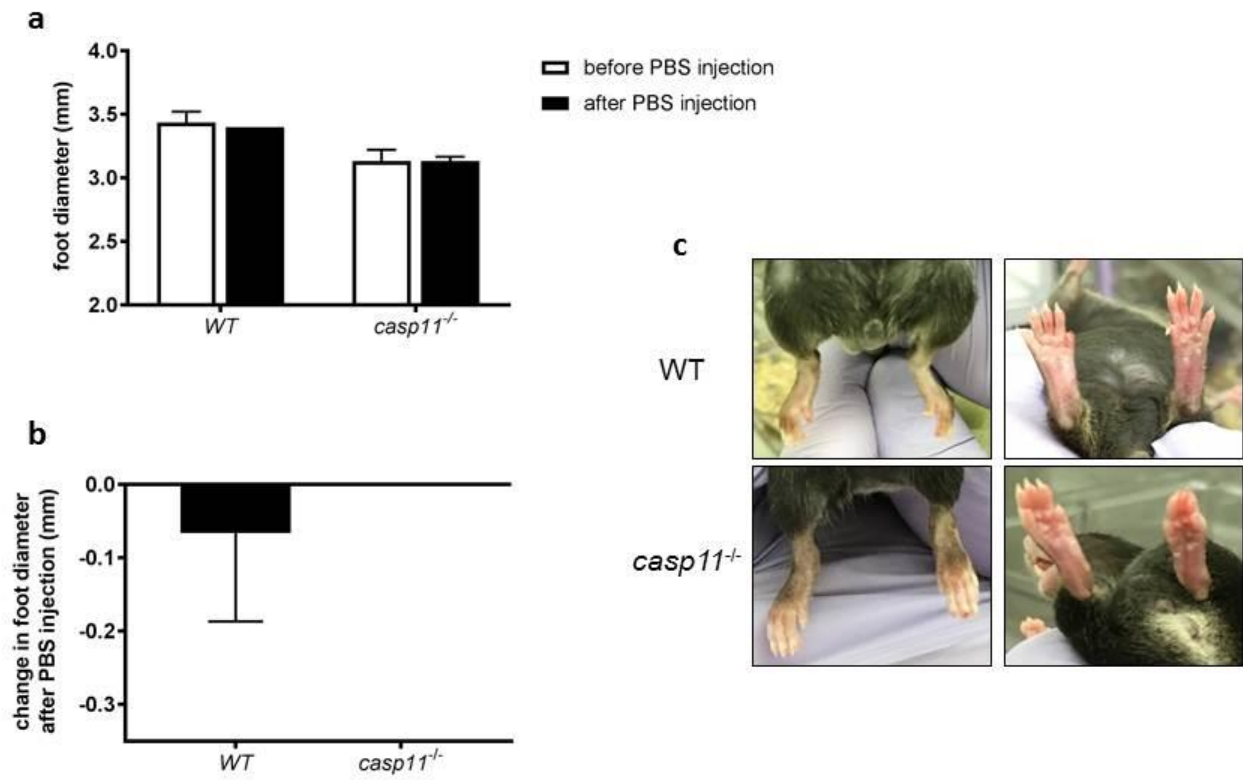

Supp Fig. 2

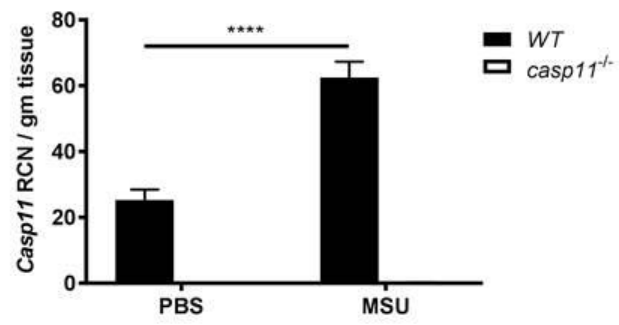

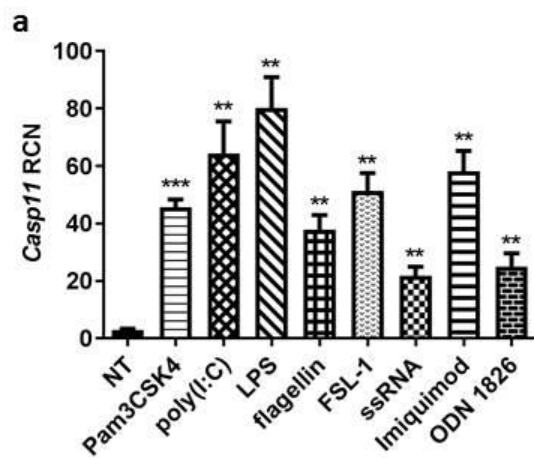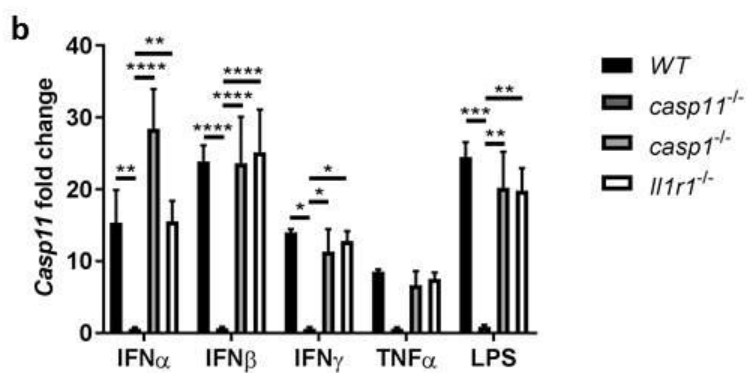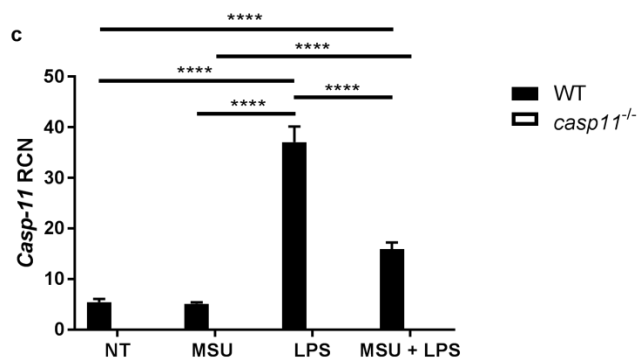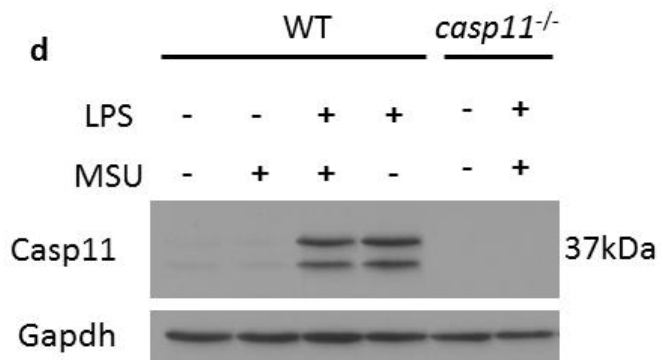

Supp Fig. 4

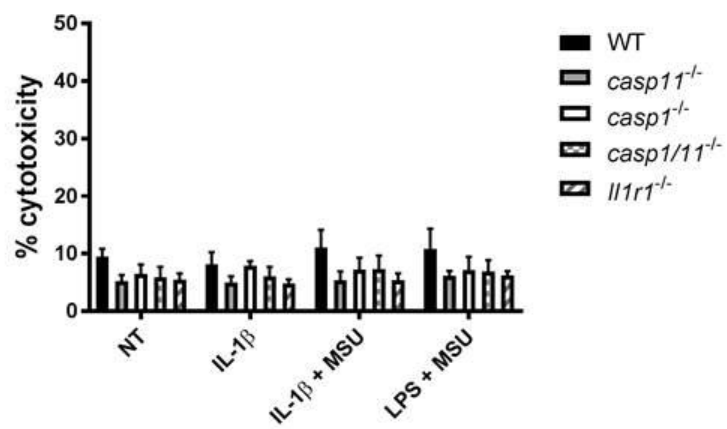

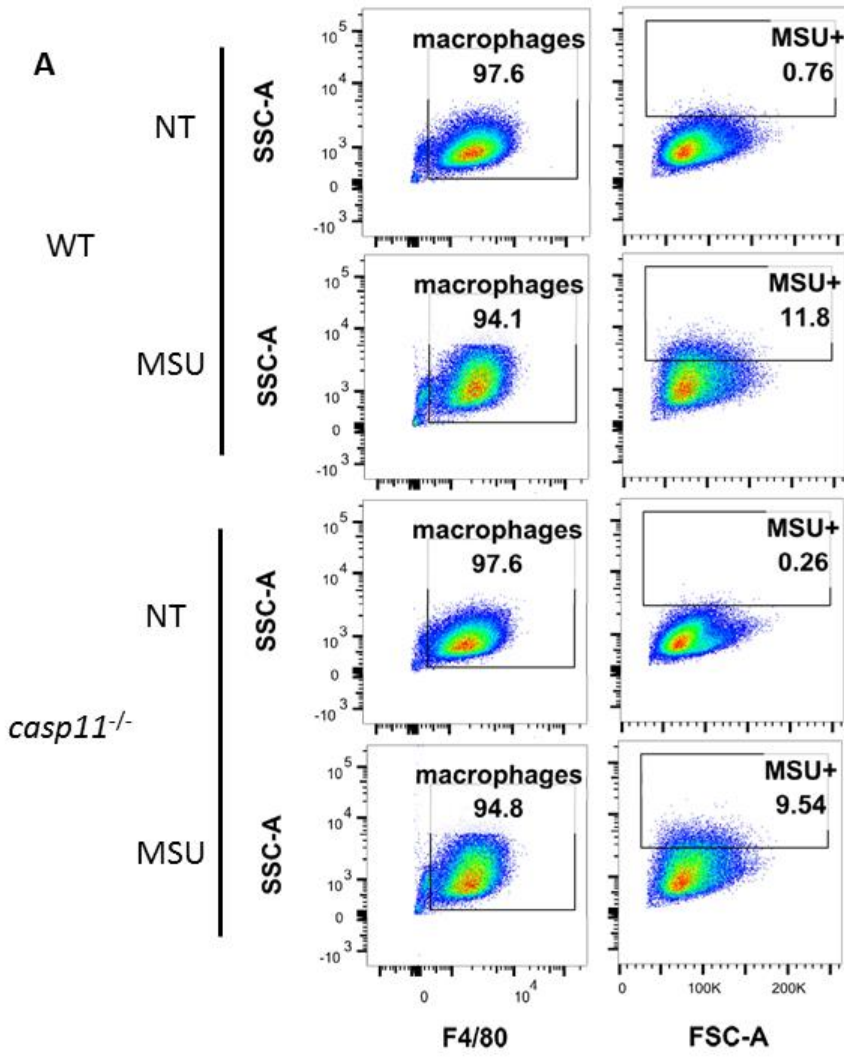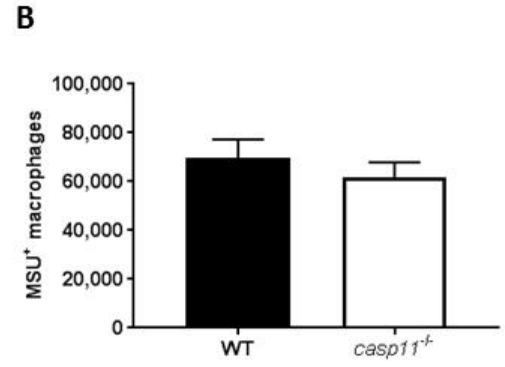

Supp. Fig. 6

| EU/ml | Absorbance @ 405 (1.0s) | Absorbance @ 630 (0.1s) | Dual Matrix Expression | Blank corrected | Average |
|-------|-------------------------|-------------------------|------------------------|-----------------|---------|
| 1     | 1.735                   | 0.048                   | 1.687                  | 1.628           |         |
| 1     | 1.801                   | 0.046                   | 1.755                  | 1.696           | 1.662   |
| 0.5   | 1.103                   | 0.044                   | 1.059                  | 1.000           |         |
| 0.5   | 1.168                   | 0.042                   | 1.126                  | 1.067           | 1.033   |
| 0.25  | 0.495                   | 0.042                   | 0.453                  | 0.394           |         |
| 0.25  | 0.527                   | 0.044                   | 0.483                  | 0.424           | 0.409   |
| 0.1   | 0.180                   | 0.041                   | 0.139                  | 0.080           |         |
| 0.1   | 0.195                   | 0.042                   | 0.152                  | 0.093           | 0.087   |
| water | 0.115                   | 0.055                   | 0.059                  | 0.000           |         |
| water | 0.131                   | 0.071                   | 0.060                  | 0.001           |         |
| MSU   | 0.159                   | 0.104                   | 0.055                  | -0.004          |         |
| MSU   | 0.089                   | 0.042                   | 0.046                  | -0.013          |         |

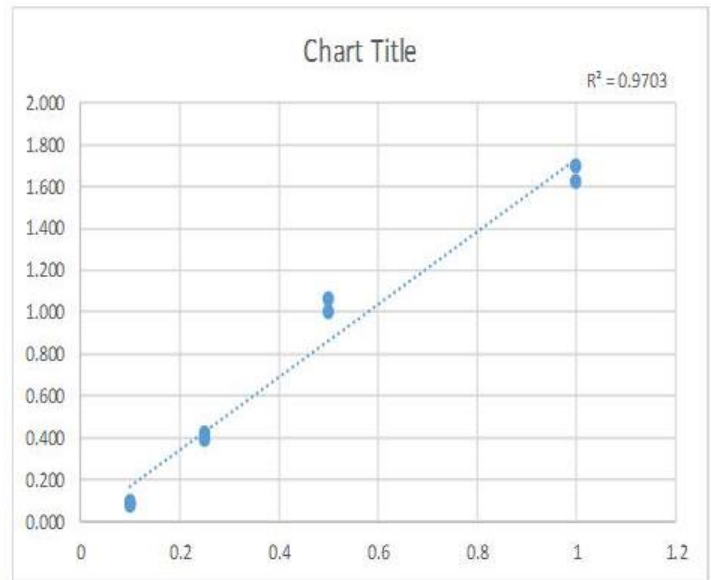

# Supp Fig. 7

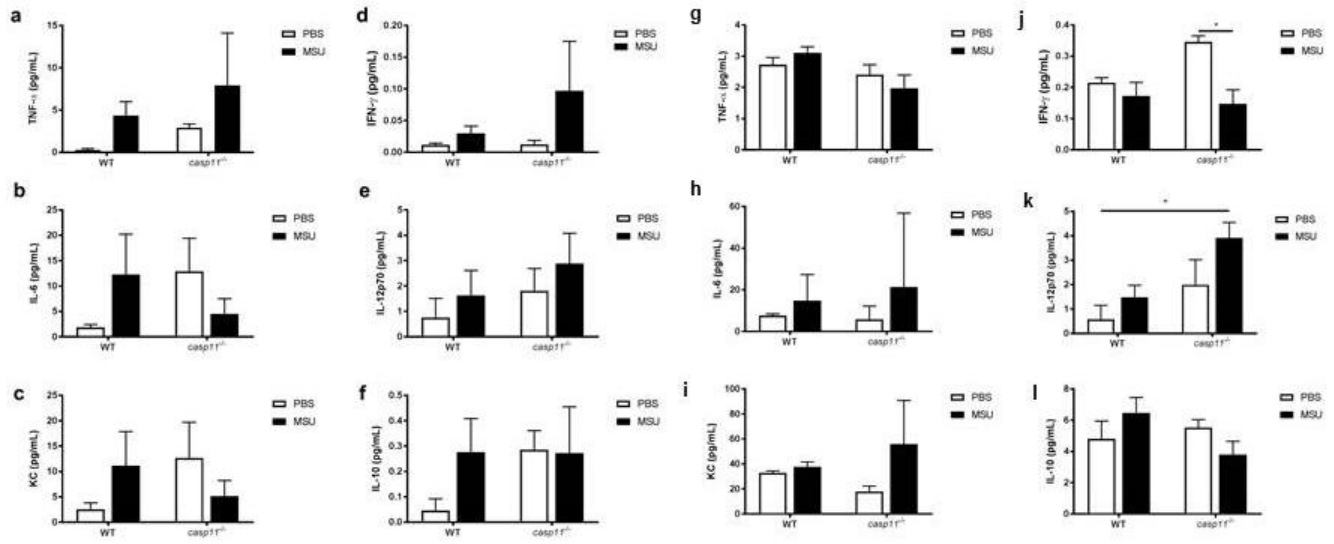

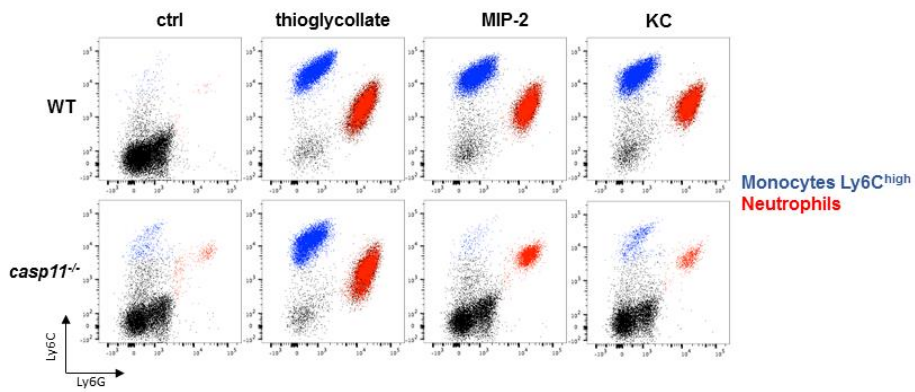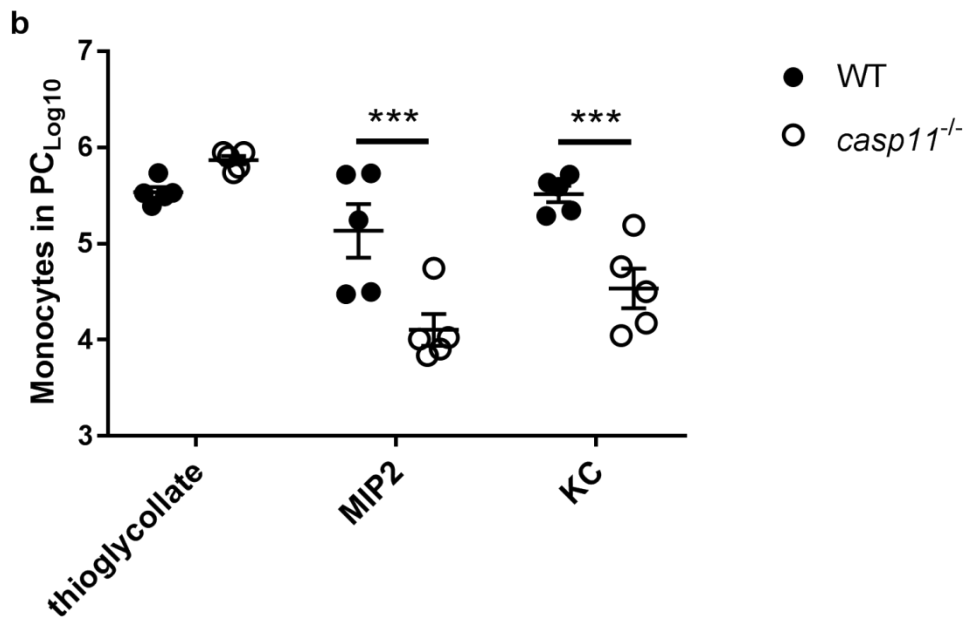

Supplement: Data_Sheet_1.pdf [file Data_Sheet_1.pdf]
